# Supplementary material for: Highly selective phenol production from benzene on a platinum-loaded tungsten oxide photocatalyst with water and molecular oxygen: selective oxidation of water by holes for generating hydroxyl radical as the predominant source of the hydroxyl group
Source: Royal Society of Chemistry journal article supplement (doi:10.1039/c4cy00445k), 2014-01-01
Supplement: c4cy00445k1.pdf [file c4cy00445k1.pdf]

## *Supporting Information*

### **Highly selective phenol production from benzene on platinum-loaded tungsten oxide photocatalyst with water and molecular oxygen: Selective oxidation of water by holes for generating hydroxyl radical as predominant source of hydroxyl group**

Osamu Tomita,<sup>a,b</sup> Bunsho Ohtani<sup>b</sup> and Ryu Abe<sup>\*a,c</sup>

<sup>\*</sup>*Graduate School of Engineering, Kyoto University, Katsura, Nishikyo-ku, Kyoto 615-8510, Japan*

<sup>†</sup>*Catalysis Research Center, Hokkaido University, Sapporo 001-0021, Japan*

<sup>‡</sup>*JSPS-NEXT Program, Koujimachi, Chiyoda-ku, Tokyo 102-0083, Japan*

*E-mail: [ryu-abe@scl.kyoto-u.ac.jp](mailto:ryu-abe@scl.kyoto-u.ac.jp)*

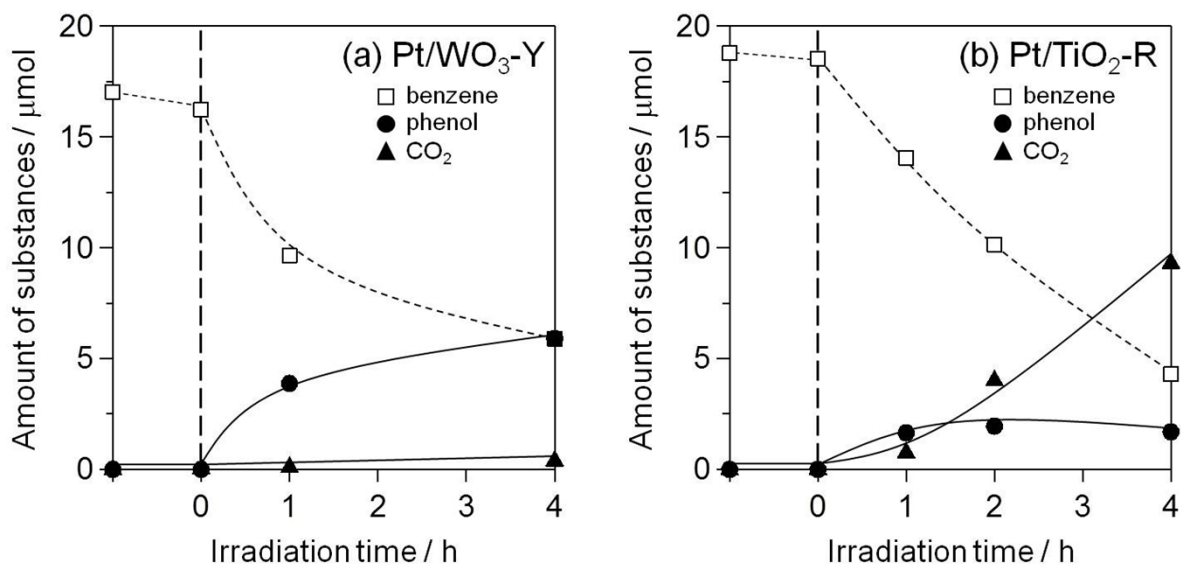

Figure S1. Time course of hydroxylation and oxidation of benzene over (a) Pt/WO<sub>3</sub>-Y and (b) Pt/TiO<sub>2</sub>-R photocatalysts in aerated aqueous solutions of benzene (18.8  $\mu\text{mol}$ ) under ultraviolet and visible light irradiation ( $300 < \lambda < 500 \text{ nm}$ ).

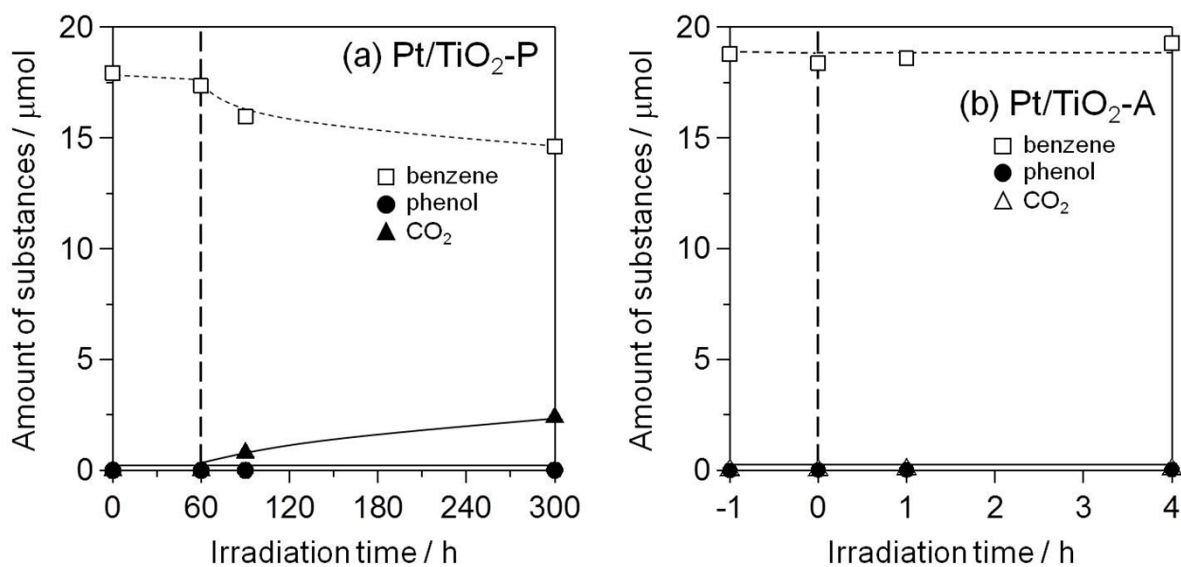

Figure S2. Time course of photocatalytic oxidation of benzene over (a) Pt/TiO<sub>2</sub>-P and (b) Pt/TiO<sub>2</sub>-A photocatalysts in aerated aqueous solutions of benzene (18.8  $\mu\text{mol}$ ) under visible light irradiation ( $400 < \lambda < 500 \text{ nm}$ ).

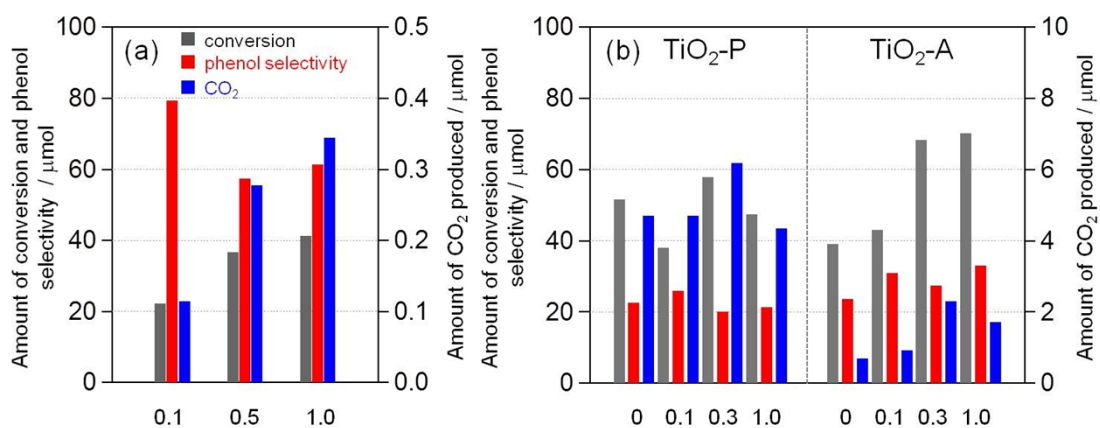

Figure S3. Influence of Pt amount on the amount of conversion, phenol selectivity, and amount of CO<sub>2</sub> on (a) Pt/WO<sub>3</sub>-K and (b) TiO<sub>2</sub> photocatalyst during hydroxylation of benzene (irradiation time 1 h).

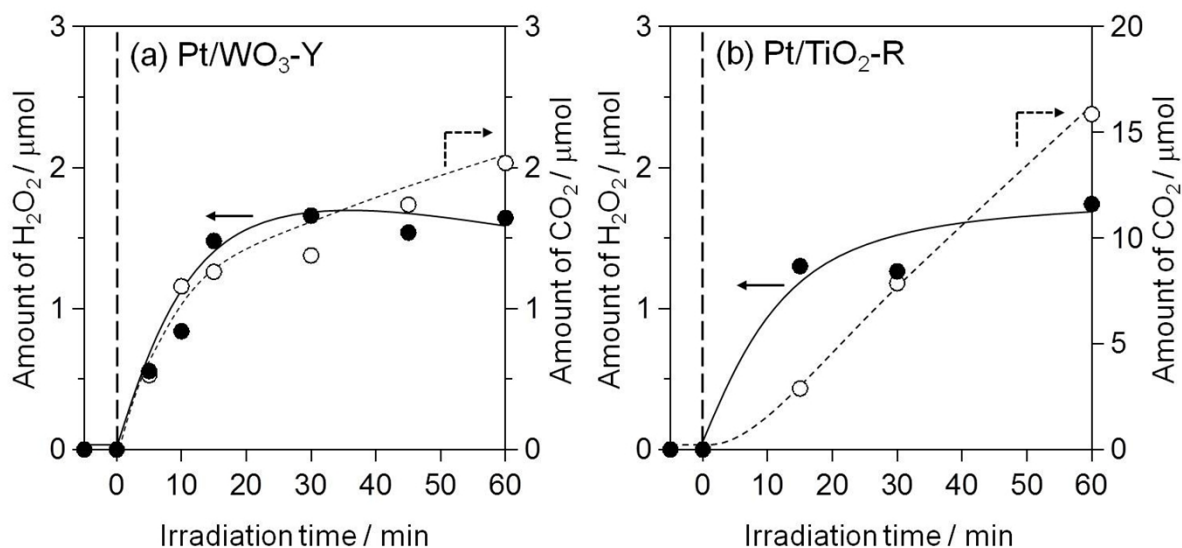

Figure S4. Time course curves of H<sub>2</sub>O<sub>2</sub> and CO<sub>2</sub> generation over (a) Pt/WO<sub>3</sub>-Y and (b) Pt/TiO<sub>2</sub>-R photocatalysts suspended in AcOH solution under ultraviolet and visible light irradiation ( $300 < \lambda < 500 \text{ nm}$ ).

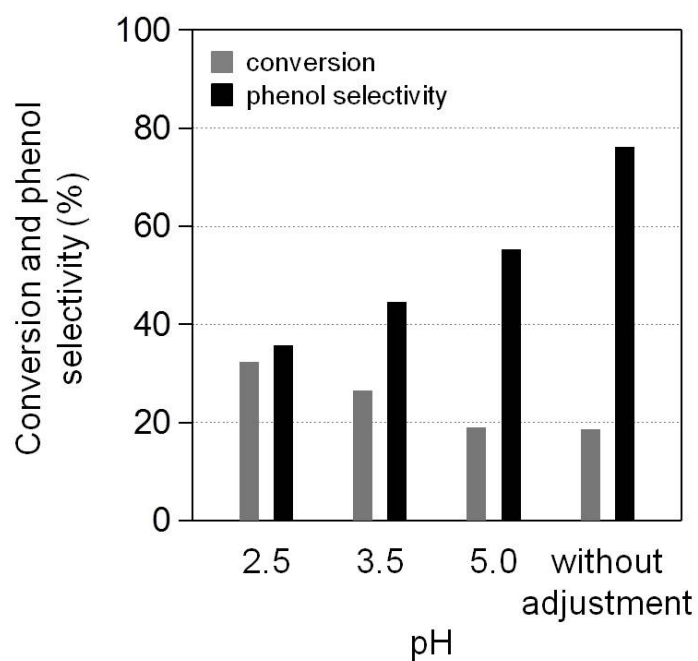

Figure S5. Dependence of photocatalytic hydroxylation of benzene on pH for use of Pt/WO<sub>3</sub>-K photocatalyst.

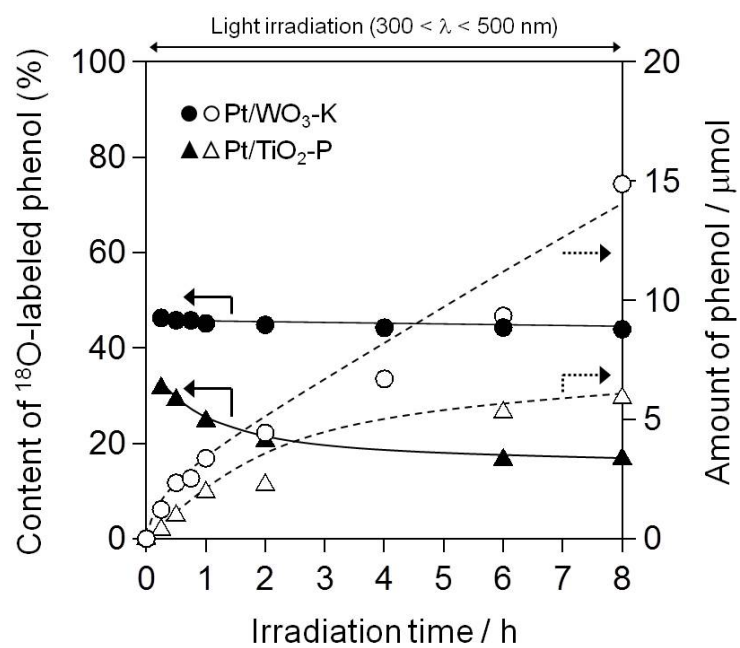

Figure S6. Time course of photocatalyzed phenol production from benzene on Pt/WO<sub>3</sub>-K and Pt/TiO<sub>2</sub>-P samples. Reactions were conducted in H<sub>2</sub><sup>16</sup>O-H<sub>2</sub><sup>18</sup>O mixed solvent containing benzene and normal molecular <sup>16</sup>O<sub>2</sub>.

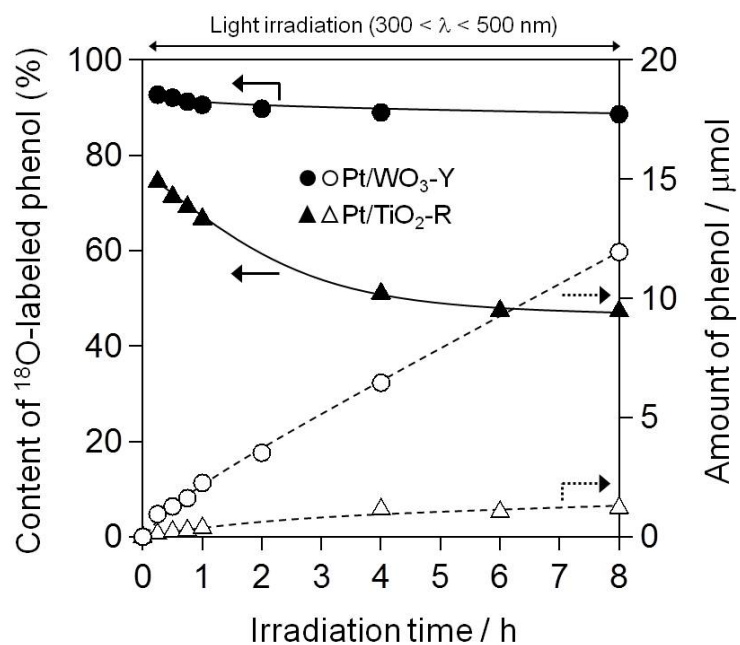

Figure S7. Time course of photocatalyzed phenol production from benzene on Pt/WO<sub>3</sub>-Y and Pt/TiO<sub>2</sub>-R samples. Reactions were conducted in <sup>18</sup>O-enriched water (98% H<sub>2</sub><sup>18</sup>O) containing benzene and normal molecular <sup>16</sup>O<sub>2</sub>.

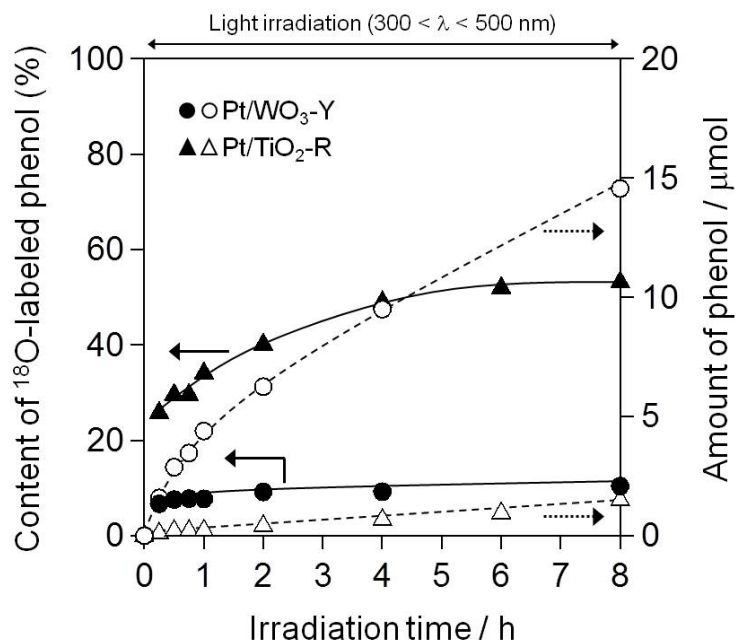

Figure S8. Time course of photocatalyzed phenol production from benzene on Pt/ $\text{WO}_3$ -Y and Pt/ $\text{TiO}_2$ -R samples. Reactions were conducted in normal water ( $\text{H}_2^{16}\text{O}$ ) containing benzene and molecular  $^{18}\text{O}_2$ .

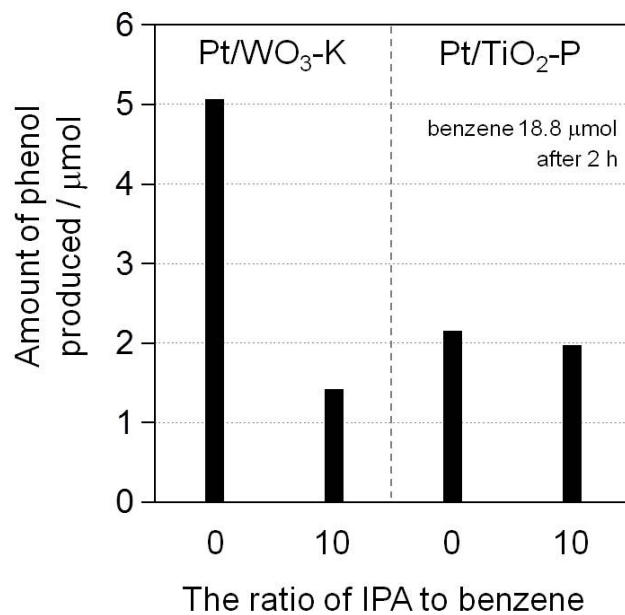

Figure S9. Amount of phenol produced from hydroxylation of benzene in the presence of IPA over Pt/ $\text{WO}_3$ -K and Pt/ $\text{TiO}_2$ -P photocatalysts.

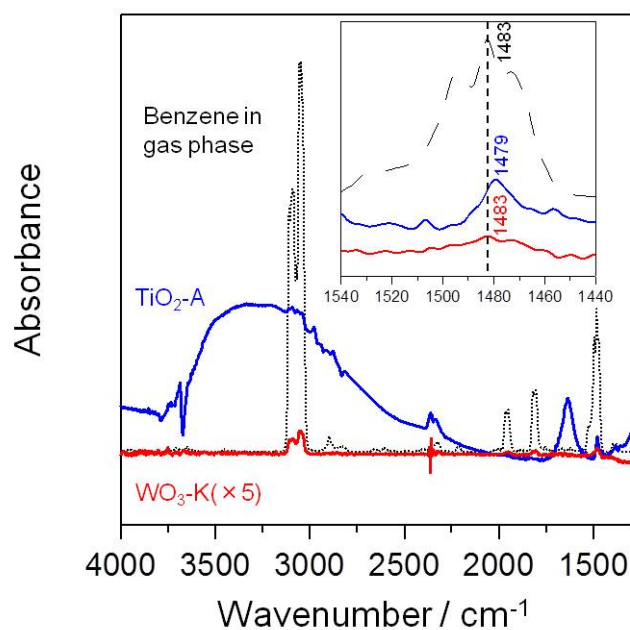

Figure S10. FT-IR subtraction spectra of benzene on photocatalysts.

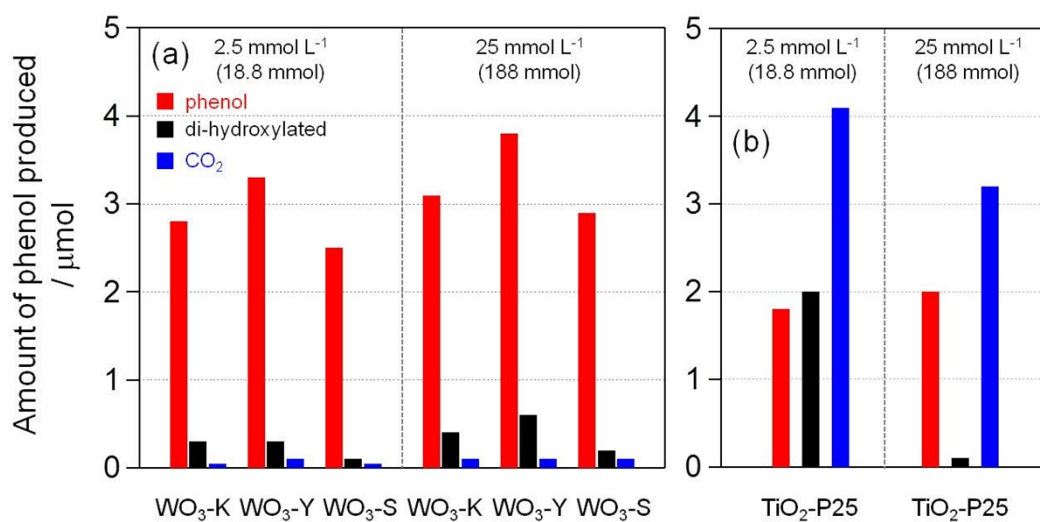

Figure S11. Influence of initial concentration of benzene on the amount of phenol, di-hydroxylated benzene and  $\text{CO}_2$  on (a)  $\text{Pt}/\text{WO}_3$  and (b)  $\text{TiO}_2$  photocatalysts during hydroxylation of benzene (Pt: 0.1 wt.%).

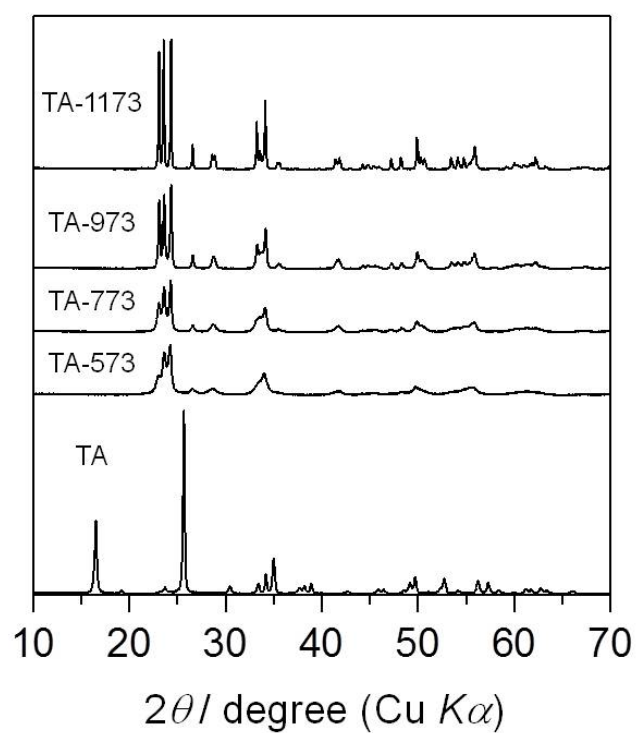

Figure S12. XRD pattern of  $\text{WO}_3$  samples obtained from tungstic acid ( $\text{H}_2\text{WO}_4$ , TA) as the W precursor.

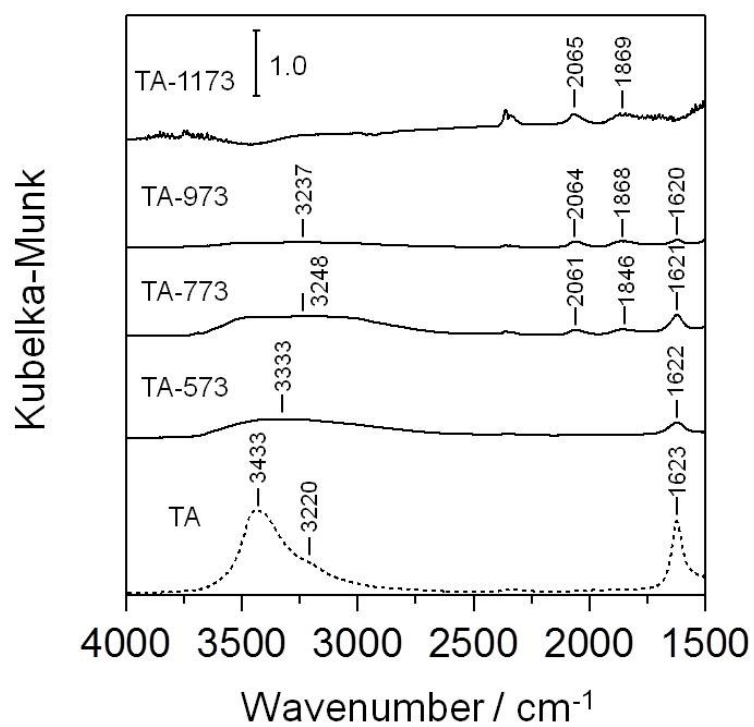



Figure S13. IR spectra of WO<sub>3</sub> samples obtained from tungstic acid (H<sub>2</sub>WO<sub>4</sub>, TA) as the W precursor.

Table S1. Direct hydroxylation of benzene to phenol on WO<sub>3</sub>-TA (prepared by calcination of tungstic acid powder) in normal water (H<sub>2</sub><sup>16</sup>O) containing benzene and molecular <sup>18</sup>O<sub>2</sub>.

| Entry | Calcination temperature / K | Content of labeled phenol (%)<br>(Amount of phenol produced / μmol) |            |
|-------|-----------------------------|---------------------------------------------------------------------|------------|
|       |                             | 1 h                                                                 | 8 h        |
| 1     | 573                         | 95.1 (0.6)                                                          | 95.2 (2.5) |
| 2     | 773                         | 94.4 (1.2)                                                          | 92.0 (3.8) |
| 3     | 973                         | 96.3 (1.3)                                                          | 93.3 (4.9) |
| 4     | 1173                        | 94.9 (0.9)                                                          | 94.0 (2.2) |

Initial concentration of benzene : 500 μmol, Amount of solvent : 1.0 mL

Light source : 300 W Xe lamp (300 < λ < 500 nm)
